# Supplementary material for: Hydrogen bonds and steric effects induced structural modulation of three layered iodoplumbate hybrids from nonperovskite to perovskite structure
Source: Royal Society of Chemistry journal article supplement (doi:10.1039/c4dt01181c), 2014-07-02
Supplement: c4dt01181c1.pdf [file c4dt01181c1.pdf]

# Hydrogen bonds and steric effects induced structural transition of three layered iodoplumbate hybrids from nonperovskite to perovskite structure

Tanlai Yu, Lin Zhang, Junju Shen, Yangbo Fu and Yunlong Fu\*

School of Chemistry & Material Science, Shanxi Normal University, Linfen 041004, P. R. China Fax & Tel : Int.  
code +86 357 2053716; E-mail: yunlongfu@dns.sxnu.edu.cn

## Supporting Information (SI)

**Table. S1** Selected bond lengths (Å) and angles (°) for **1-3**.

| Compound 1         |             |                     |             |
|--------------------|-------------|---------------------|-------------|
| Pb(1)-I(1)         | 3.1264(7)   | Pb(1)-I(3)          | 3.1953(5)   |
| Pb(1)-I(3)#1       | 3.1590(5)   | Pb(1)-I(2)#2        | 3.2692(5)   |
| Pb(1)-I(2)         | 3.1904(5)   | Pb(1)-I(4)          | 3.3121(7)   |
| I(2)-Pb(1)#3       | 3.2692(5)   | I(3)-Pb(1)#4        | 3.1590(5)   |
| I(1)-Pb(1)-I(3)#1  | 93.453(17)  | I(3)#1-Pb(1)-I(3)   | 86.286(6)   |
| I(1)-Pb(1)-I(2)    | 88.998(16)  | I(2)-Pb(1)-I(3)     | 179.78(2)   |
| I(3)#1-Pb(1)-I(2)  | 93.570(15)  | I(1)-Pb(1)-I(2)#2   | 91.439(17)  |
| I(1)-Pb(1)-I(3)    | 91.182(16)  | I(3)#1-Pb(1)-I(2)#2 | 174.848(19) |
| I(2)-Pb(1)-I(2)#2  | 84.891(6)   | I(2)-Pb(1)-I(4)     | 92.530(17)  |
| I(3)-Pb(1)-I(2)#2  | 95.237(14)  | I(3)-Pb(1)-I(4)     | 87.302(17)  |
| I(1)-Pb(1)-I(4)    | 174.691(16) | I(2)#2-Pb(1)-I(4)   | 83.638(17)  |
| I(3)#1-Pb(1)-I(4)  | 91.527(17)  |                     |             |
| Pb(1)-I(2)-Pb(1)#3 | 162.73(2)   | Pb(1)#4-I(3)-Pb(1)  | 167.41(2)   |

  

| Compound 2          |            |                     |            |
|---------------------|------------|---------------------|------------|
| Pb(1)-I(2)#1        | 3.1764(2)  | Pb(2)-I(4)          | 3.0706(3)  |
| Pb(1)-I(2)          | 3.1764(2)  | Pb(2)-I(6)          | 3.1058(3)  |
| Pb(1)-I(1)#1        | 3.1802(3)  | Pb(2)-I(7)          | 3.1654(3)  |
| Pb(1)-I(1)          | 3.1802(3)  | Pb(2)-I(1)#2        | 3.2392(3)  |
| Pb(1)-I(3)          | 3.2561(3)  | Pb(2)-I(2)          | 3.3207(3)  |
| Pb(1)-I(3)#1        | 3.2561(3)  | Pb(2)-I(5)          | 3.4759(3)  |
| Pb(3)-I(8)          | 3.0490(4)  | Pb(3)-I(6)          | 3.2439(3)  |
| Pb(3)-I(9)#3        | 3.1597(3)  | Pb(3)-I(7)          | 3.3259(3)  |
| Pb(3)-I(9)          | 3.2128(3)  | Pb(3)-I(5)          | 3.5456(3)  |
| I(2)#1-Pb(1)-I(2)   | 180.0      | I(1)#1-Pb(1)-I(3)   | 95.222(8)  |
| I(2)#1-Pb(1)-I(1)#1 | 88.434(7)  | I(1)-Pb(1)-I(3)     | 84.778(8)  |
| I(2)-Pb(1)-I(1)#1   | 91.566(7)  | I(1)#1-Pb(1)-I(3)#1 | 84.779(7)  |
| I(2)#1-Pb(1)-I(1)   | 91.566(7)  | I(1)-Pb(1)-I(3)#1   | 95.221(8)  |
| I(2)-Pb(1)-I(1)     | 88.434(7)  | I(1)#1-Pb(1)-I(1)   | 180.000(1) |
| I(2)#1-Pb(1)-I(3)   | 91.173(7)  | I(2)#1-Pb(1)-I(3)#1 | 88.827(7)  |
| I(2)-Pb(1)-I(3)     | 88.827(7)  | I(2)-Pb(1)-I(3)#1   | 91.173(7)  |
| I(3)-Pb(1)-I(3)#1   | 180.000(7) | I(4)-Pb(2)-I(6)     | 96.060(8)  |

|                    |            |                    |            |
|--------------------|------------|--------------------|------------|
| I(4)-Pb(2)-I(7)    | 93.647(9)  | I(4)-Pb(2)-I(2)    | 96.189(8)  |
| I(6)-Pb(2)-I(7)    | 91.393(7)  | I(6)-Pb(2)-I(2)    | 166.209(8) |
| I(4)-Pb(2)-I(1)#2  | 93.862(8)  | I(7)-Pb(2)-I(2)    | 94.128(7)  |
| I(6)-Pb(2)-I(1)#2  | 86.515(7)  | I(1)#2-Pb(2)-I(2)  | 86.362(7)  |
| I(7)-Pb(2)-I(1)#2  | 172.378(8) | I(4)-Pb(2)-I(5)    | 174.788(7) |
| I(6)-Pb(2)-I(5)    | 87.609(8)  | I(1)#2-Pb(2)-I(5)  | 90.046(8)  |
| I(7)-Pb(2)-I(5)    | 82.540(8)  | I(2)-Pb(2)-I(5)    | 80.603(7)  |
| I(8)-Pb(3)-I(9)#3  | 91.614(9)  | I(9)#3-Pb(3)-I(7)  | 174.305(8) |
| I(8)-Pb(3)-I(9)    | 97.786(8)  | I(9)-Pb(3)-I(7)    | 88.502(7)  |
| I(9)#3-Pb(3)-I(9)  | 92.696(7)  | I(6)-Pb(3)-I(7)    | 86.171(7)  |
| I(8)-Pb(3)-I(6)    | 93.022(8)  | I(8)-Pb(3)-I(5)    | 172.667(8) |
| I(9)#3-Pb(3)-I(6)  | 91.616(7)  | I(9)#3-Pb(3)-I(5)  | 95.293(8)  |
| I(9)-Pb(3)-I(6)    | 168.240(8) | I(9)-Pb(3)-I(5)    | 84.368(7)  |
| I(8)-Pb(3)-I(7)    | 93.741(9)  | I(6)-Pb(3)-I(5)    | 84.344(7)  |
| I(7)-Pb(3)-I(5)    | 79.276(8)  |                    |            |
| Pb(1)-I(1)-Pb(2)#4 | 162.051(8) | Pb(2)-I(6)-Pb(3)   | 80.416(7)  |
| Pb(1)-I(2)-Pb(2)   | 160.651(9) | Pb(2)-I(7)-Pb(3)   | 78.308(7)  |
| Pb(2)-I(5)-Pb(3)   | 71.454(7)  | Pb(3)#3-I(9)-Pb(3) | 87.304(7)  |

Compound 3

|                     |             |                      |             |
|---------------------|-------------|----------------------|-------------|
| Pb(1)-I(2)          | 3.1905(5)   | Pb(1)-I(1)           | 3.2282(5)   |
| Pb(1)-I(2)#1        | 3.1905(5)   | Pb(1)-I(3)           | 3.2327(5)   |
| Pb(1)-I(1)#1        | 3.2282(5)   | Pb(1)-I(3)#1         | 3.2327(5)   |
| Pb(2)-I(4)          | 2.9810(6)   | Pb(2)-I(2)#1         | 3.2504(6)   |
| Pb(2)-I(3)          | 3.1894(6)   | Pb(2)-I(2)#3         | 3.2897(6)   |
| Pb(2)-I(1)#2        | 3.2341(6)   |                      |             |
| I(2)-Pb(1)-I(2)#1   | 180.0       | I(2)-Pb(1)-I(1)#1    | 90.035(14)  |
| I(2)#1-Pb(1)-I(1)#1 | 89.965(14)  | I(2)#1-Pb(1)-I(1)    | 90.035(14)  |
| I(2)-Pb(1)-I(1)     | 89.965(14)  | I(1)#1-Pb(1)-I(1)    | 180.0       |
| I(2)-Pb(1)-I(3)     | 91.181(13)  | I(1)#1-Pb(1)-I(3)    | 90.673(12)  |
| I(2)#1-Pb(1)-I(3)   | 88.819(13)  | I(1)-Pb(1)-I(3)      | 89.327(12)  |
| I(2)-Pb(1)-I(3)#1   | 88.819(13)  | I(1)#1-Pb(1)-I(3)#1  | 89.327(12)  |
| I(2)#1-Pb(1)-I(3)#1 | 91.181(13)  | I(1)-Pb(1)-I(3)#1    | 90.673(12)  |
| I(3)-Pb(1)-I(3)#1   | 180.0       | I(3)-Pb(2)-I(1)#2    | 85.609(15)  |
| I(4)-Pb(2)-I(3)     | 95.622(16)  | I(4)-Pb(2)-I(2)#1    | 90.393(16)  |
| I(4)-Pb(2)-I(1)#2   | 92.807(15)  | I(3)-Pb(2)-I(2)#1    | 88.528(14)  |
| I(1)#2-Pb(2)-I(2)#1 | 173.569(16) | I(1)#2-Pb(2)-I(2)#3  | 98.287(15)  |
| I(4)-Pb(2)-I(2)#3   | 94.516(16)  | I(2)#1-Pb(2)-I(2)#3  | 87.011(10)  |
| I(3)-Pb(2)-I(2)#3   | 168.948(14) |                      |             |
| Pb(1)-I(1)-Pb(2)#2  | 96.584(13)  | Pb(1)-I(2)-Pb(2)#4   | 132.565(17) |
| Pb(1)-I(2)-Pb(2)#1  | 91.035(15)  | Pb(2)#1-I(2)-Pb(2)#4 | 135.936(17) |
| Pb(2)-I(3)-Pb(1)    | 91.379(13)  |                      |             |

Symmetry code: for 1: #1 -x, -y+1, -z+1; #2 x+1, y, z; #3 -x+1, -y+1, -z; #4 x-1, y, z; for 2: #1 -x+2, -y+1, -z+2; #2 -x+2, -y, -z+2; #3 x, -y+1/2, z-1/2; #4 x, -y+1/2, z+1/2; #5 -x+1, -y, -z+2; for 3: #1 -x+2, -y+1, -z+2; #2 -x+2, -y, -z+2; #3 x, -y+1/2, z-1/2; #4 x, -y+1/2, z+1/2; #5 -x+1, -y, -z+2.

Table S2. The correlation among crystal color, band gap energy ( $E_g$ ) and Pb-I-Pb bond angles in the compound 1 and reported perovskite iodoplumbates

| Compound                                                                                            | Crystal color | Pb-I-Pb              | $E_g$ (eV) |
|-----------------------------------------------------------------------------------------------------|---------------|----------------------|------------|
| (Cl-(CH <sub>2</sub> ) <sub>2</sub> -NH <sub>3</sub> ) <sub>2</sub> PbI <sub>4</sub> <sup>19a</sup> | red           | 178.07(3), 176.68(2) | 2.2        |
| (Br-(CH <sub>2</sub> ) <sub>2</sub> -NH <sub>3</sub> ) <sub>2</sub> PbI <sub>4</sub> <sup>19a</sup> | red           | 178.49(3)            | 2.2        |
| (OH-(CH <sub>2</sub> ) <sub>3</sub> -NH <sub>3</sub> ) <sub>2</sub> PbI <sub>4</sub> <sup>13</sup>  | red           | 163.679(13)          |            |
| [H <sub>2</sub> DMAPA][PbI <sub>4</sub> ](compound 1)                                               | red           | 162.73(2), 167.41(2) | 2.21       |
| (OH-(CH <sub>2</sub> ) <sub>2</sub> -NH <sub>3</sub> ) <sub>2</sub> PbI <sub>4</sub> <sup>16a</sup> | orange        | 159.836(18)          | 2.31       |
| (I-(CH <sub>2</sub> ) <sub>2</sub> -NH <sub>3</sub> ) <sub>2</sub> PbI <sub>4</sub> <sup>19a</sup>  | orange        | 147.379(15)          | 2.45       |
| (BAESBT)PbI <sub>4</sub> <sup>19b</sup>                                                             | orange        | 149.40(3), 151.87(3) | 2.535      |

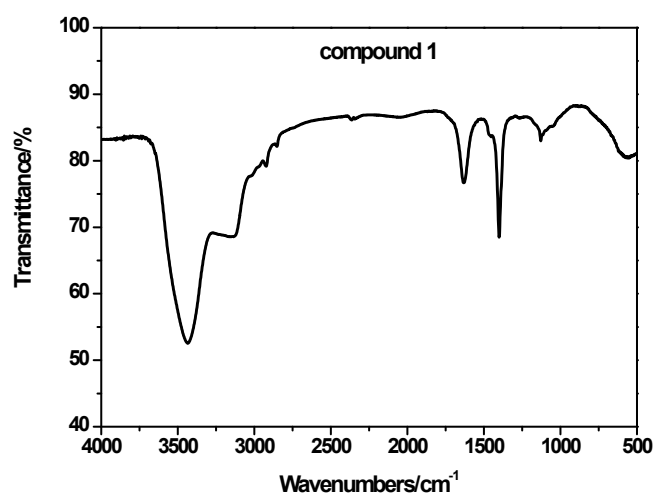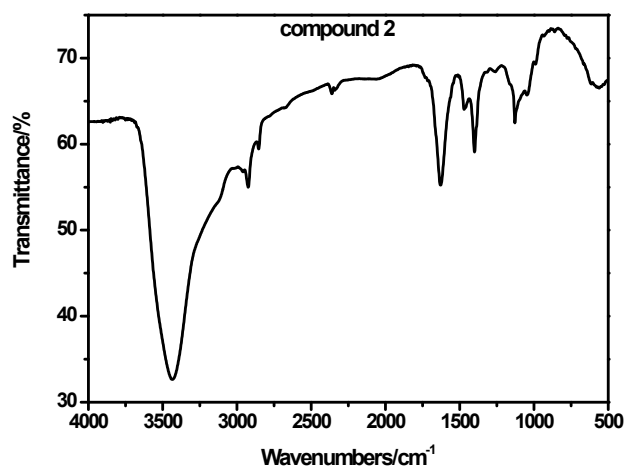

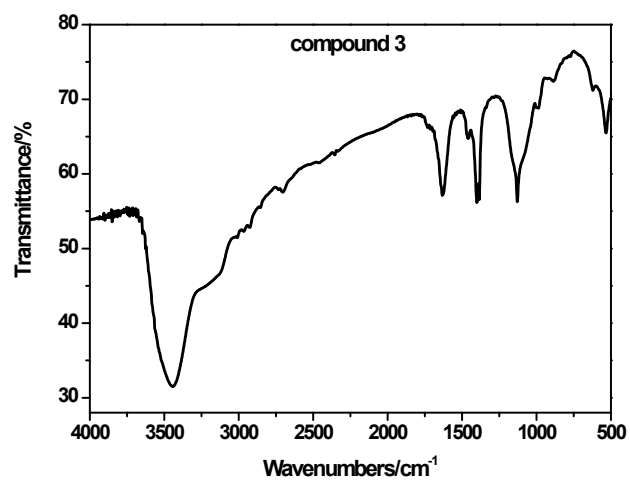

Figure. S1 IR spectra for 1 -3

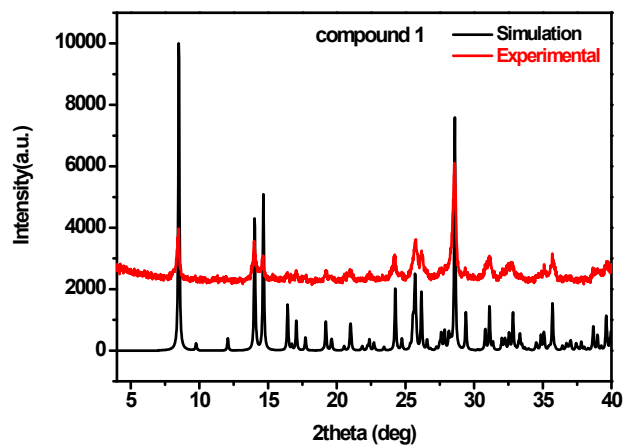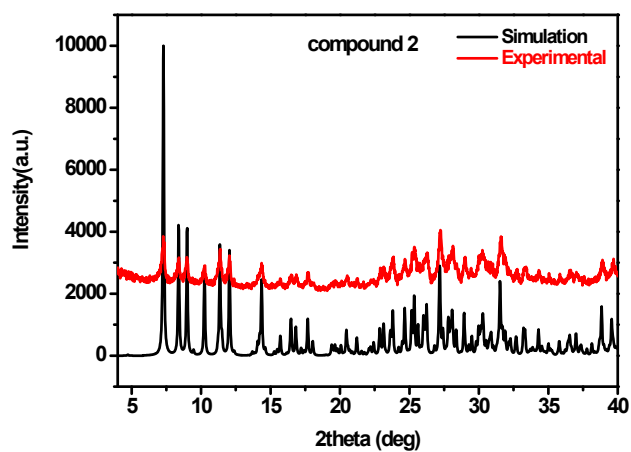

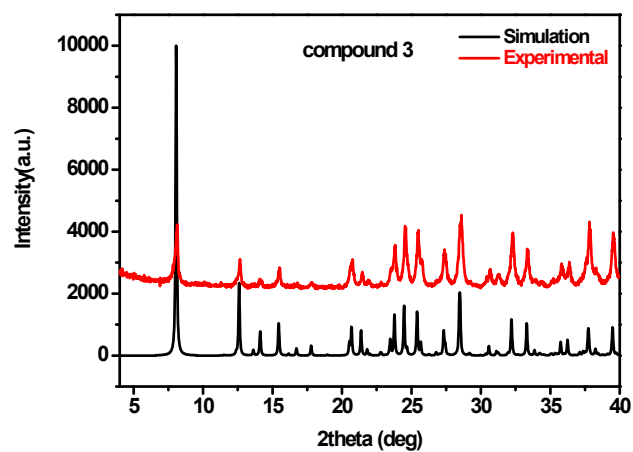

**Fig. S2** Experimental XRPD patterns of compound 1-3 exposed in air (red) and simulation patterns of compound 1  
-3 (black).
